# Supplementary material for: The splicing regulator PTBP1 controls the activity of the transcription factor Pbx1 during neuronal differentiation
Source: eLife journal article supplement (doi:10.7554/elife.09268), 2015-12-24

**A**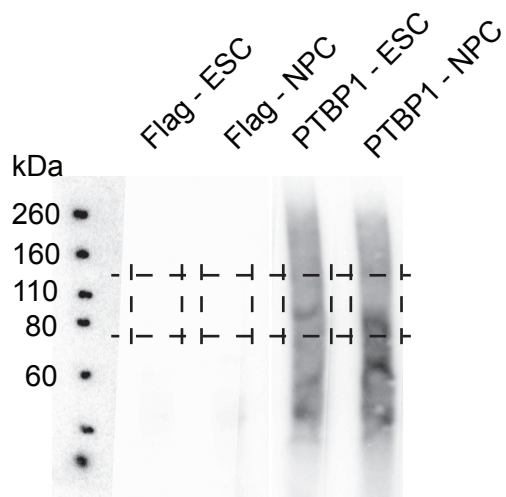**B**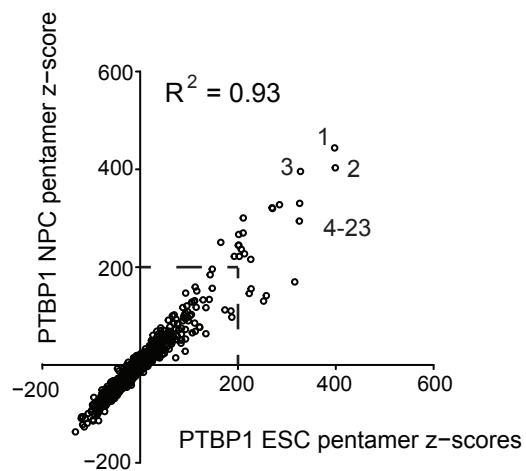

|          |           |           |           |
|----------|-----------|-----------|-----------|
| 1) UUUCU | 7) CUUUU  | 13) UCUGU | 19) CCUUU |
| 2) UCUUU | 8) UCCUU  | 14) UGUUU | 20) CUUCU |
| 3) UUCUU | 9) UUCCU  | 15) UGUCU | 21) CUUCC |
| 4) CUUUC | 10) GUGUG | 16) UUCUC | 22) CCUUC |
| 5) UUUUC | 11) UUUUU | 17) UCUUC | 23) UCUCU |
| 6) UGUGU | 12) UUUGU | 18) UUUCC |           |

**C**PTBP1 iCLIP reads - **ESC**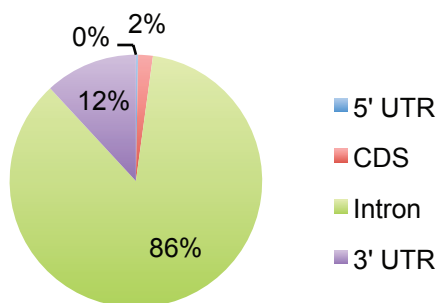**D**PTBP1 iCLIP reads - **NPC**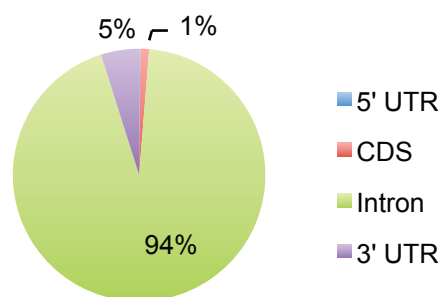**E****ESC**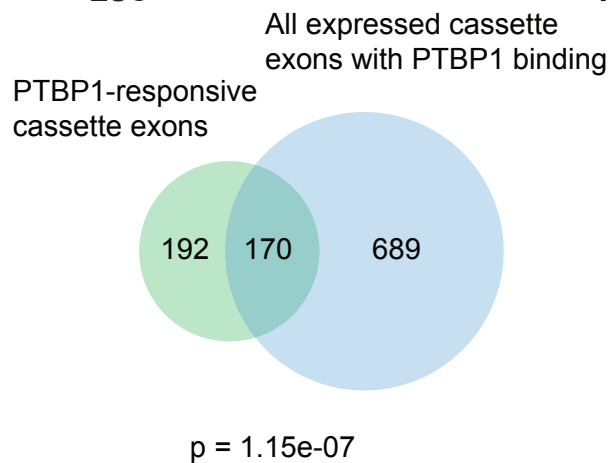**F****NPC**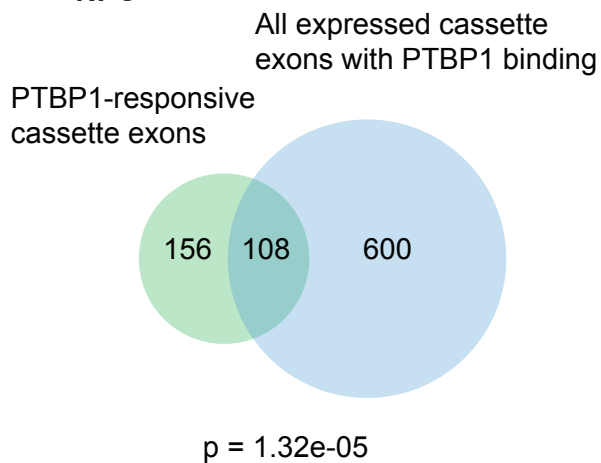

Supplement: supp [file elife-09268-supp-v1.zip]
