# Supplementary material for: The splicing regulator PTBP1 controls the activity of the transcription factor Pbx1 during neuronal differentiation
Source: eLife journal article supplement (doi:10.7554/elife.09268), 2015-12-24

**A** Day 2 MN culture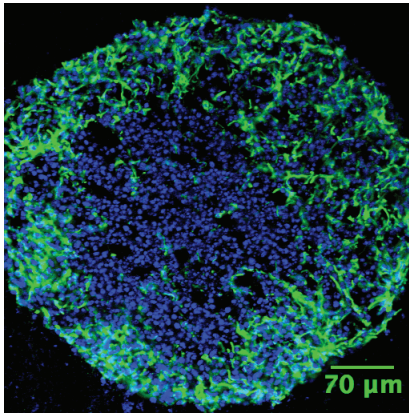

Nestin DAPI

**B** Day 5 MN culture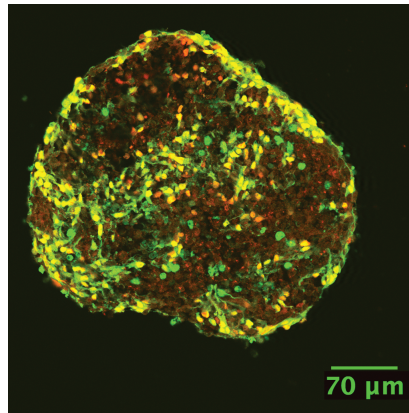

GFP HB9

**C** Day 8 MN culture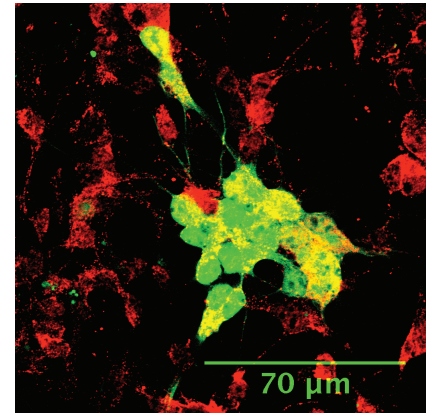

GFP PTBP2

**D**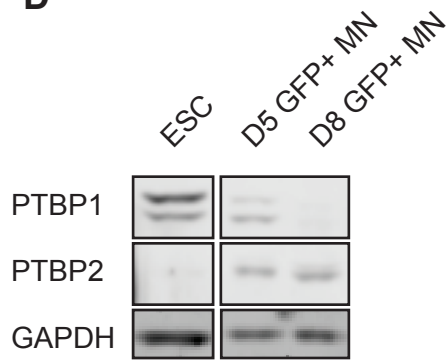**E** NPC culture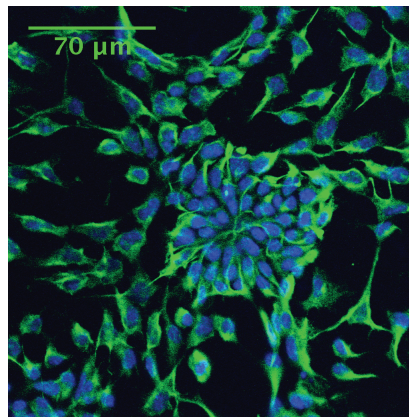

Nestin DAPI

**F** NPC culture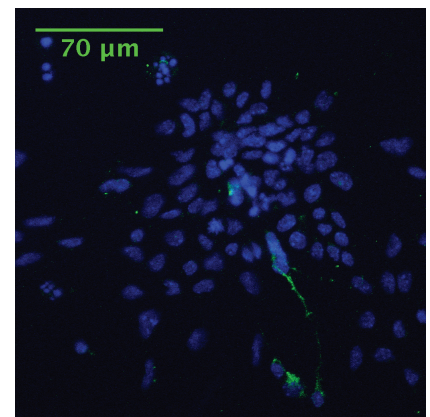

TuJ1 DAPI

**G**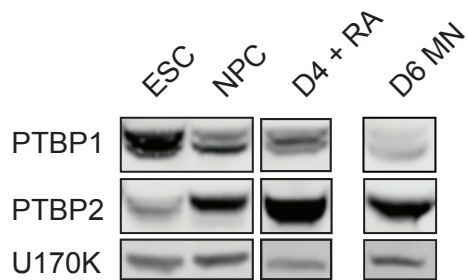**H**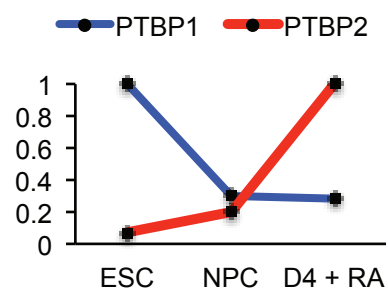

Supplement: supp [file elife-09268-supp-v1.zip]
