# Supplementary material for: The splicing regulator PTBP1 controls the activity of the transcription factor Pbx1 during neuronal differentiation
Source: eLife journal article supplement (doi:10.7554/elife.09268), 2015-12-24

**A**

Guides 1 and 4 target Cas9 to two sites within Pbx1 intron 6.

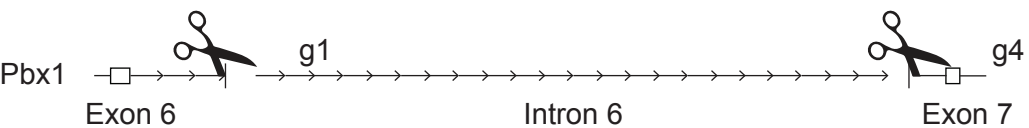

Non-homologous end joining creates large deletion within Pbx1 intron 6.

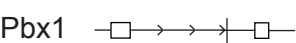

**B**

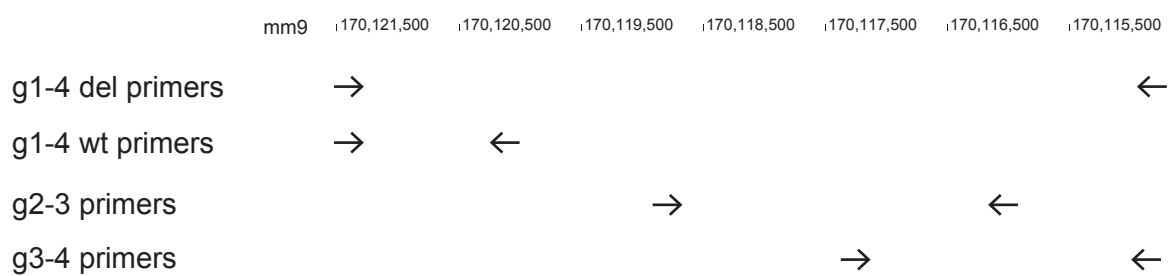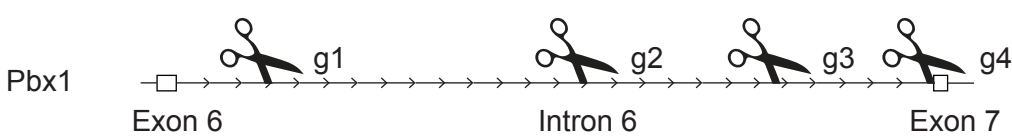

**C**

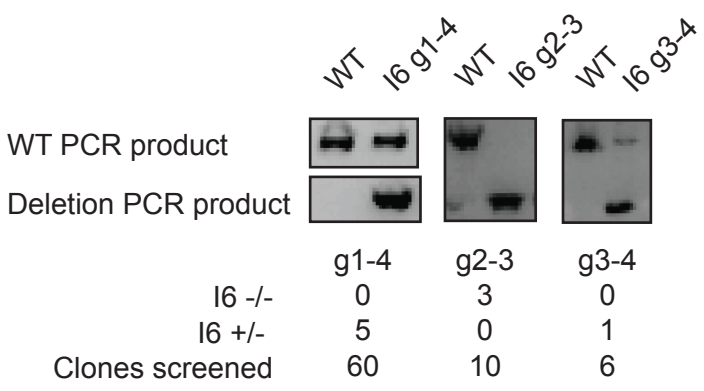

**D**

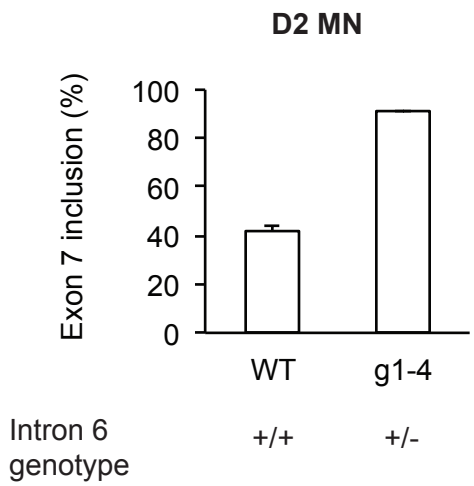

Supplement: supp [file elife-09268-supp-v1.zip]
