# Supplementary figures and images for: The splicing regulator PTBP1 controls the activity of the transcription factor Pbx1 during neuronal differentiation
Source: eLife journal article supplement (doi:10.7554/elife.09268), 2015-12-24

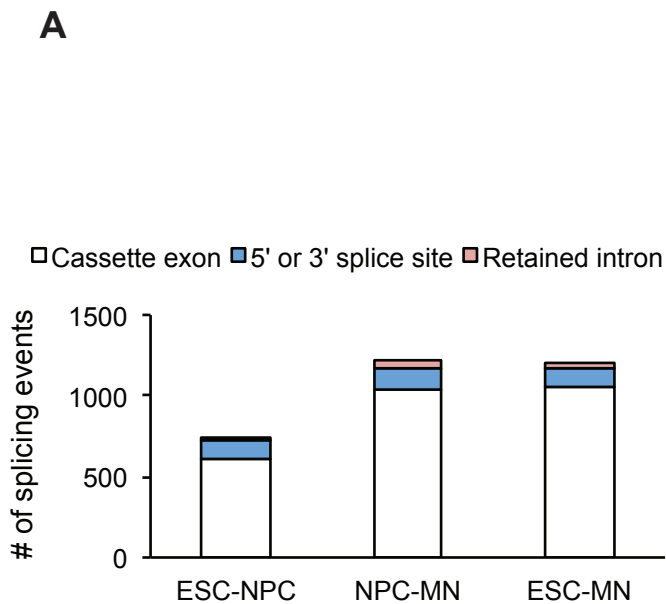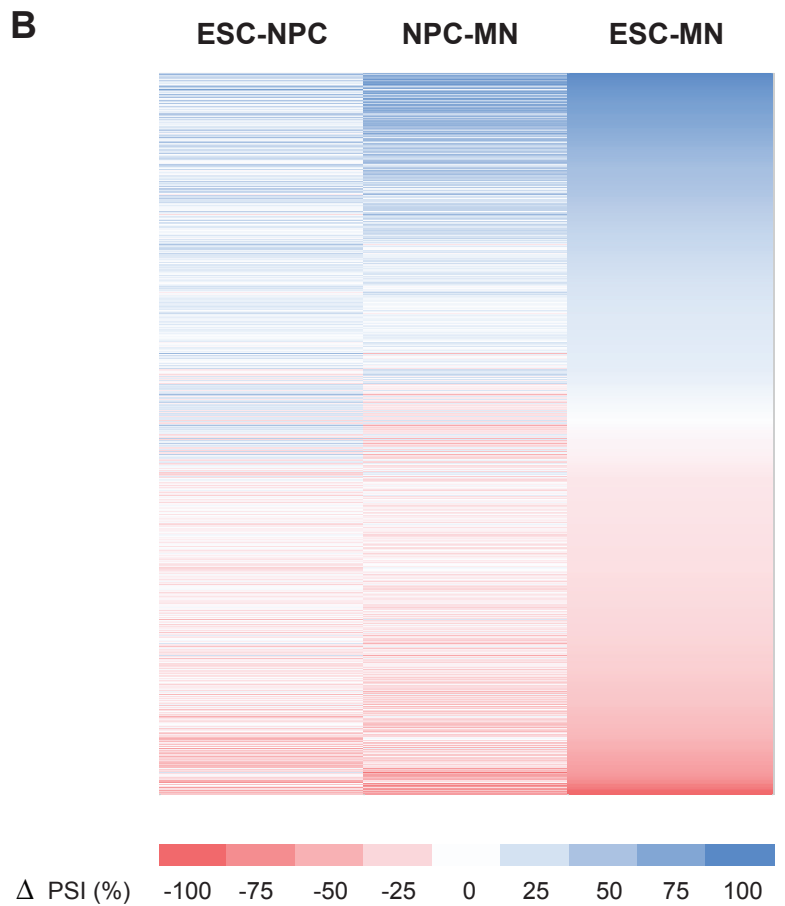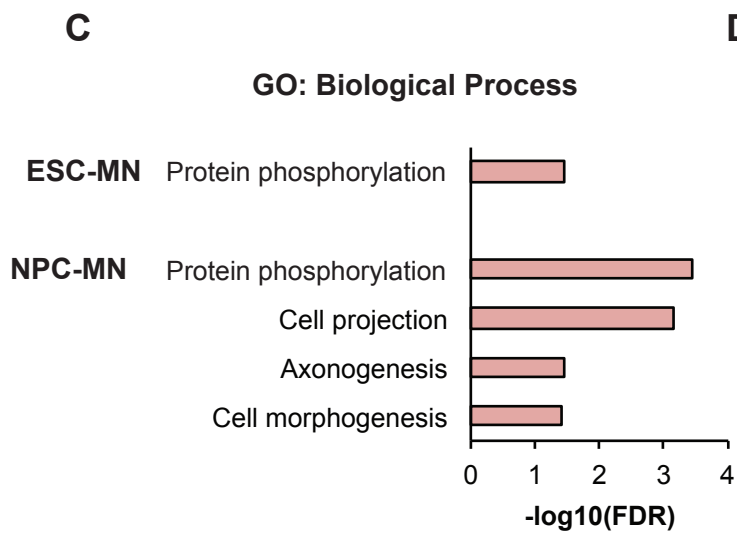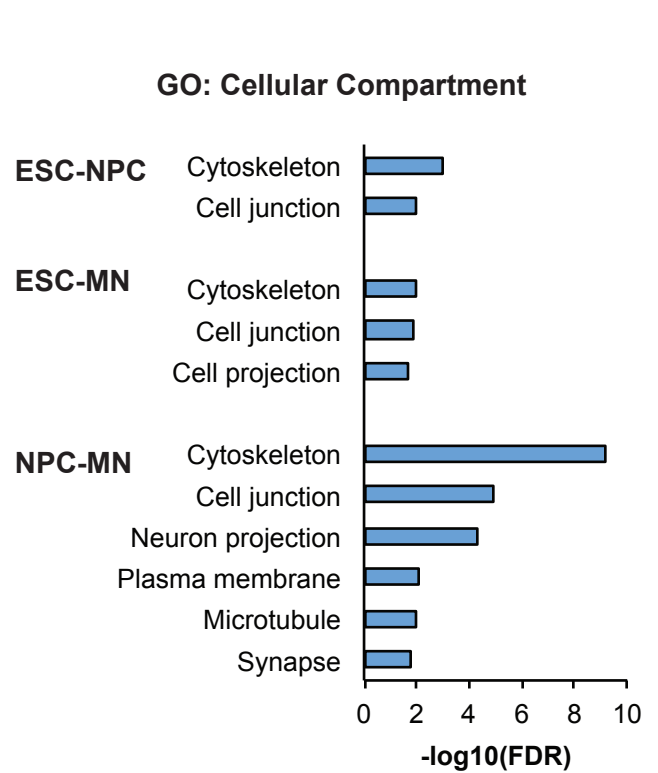

Supplement: supp [file elife-09268-supp-v1.zip]

# RNA-seq

# ChIP-qPCR

Neuronal diff

D2 MNs

Pbx1

Meis1

Prep1

**A**

Hoxa3

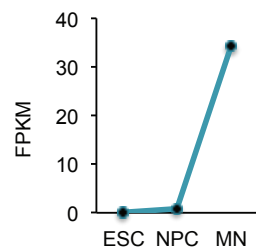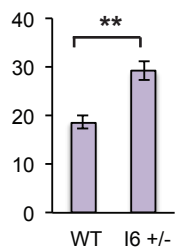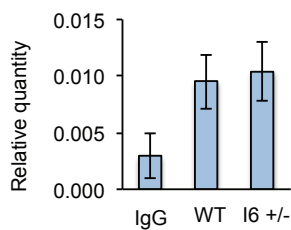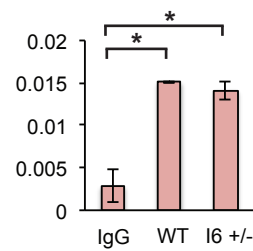

**B**

Midn

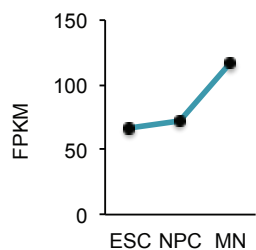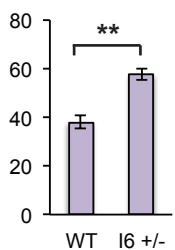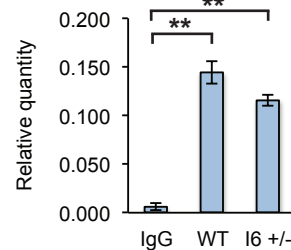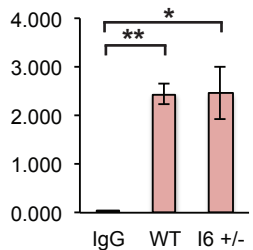

**C**

Tshz3

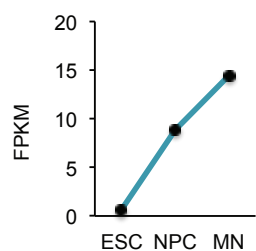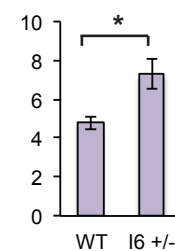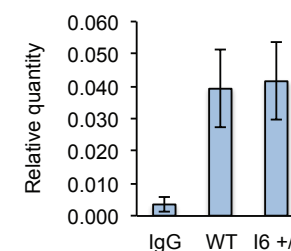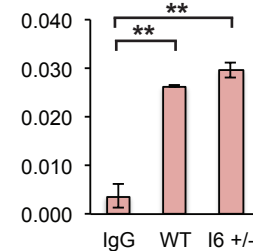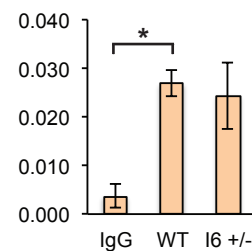

**D**

Zfp503

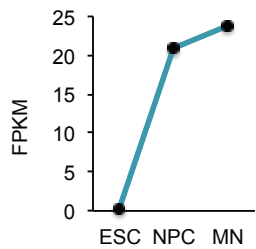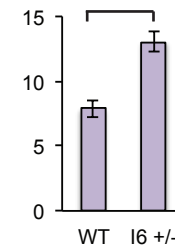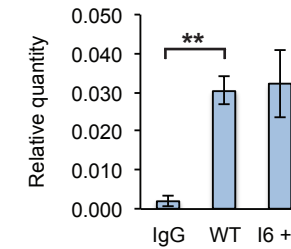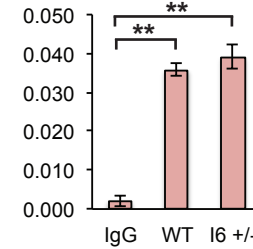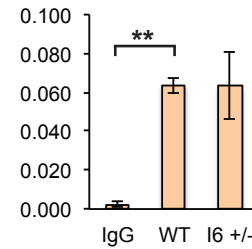

**E**

Igf1r

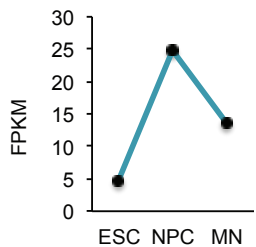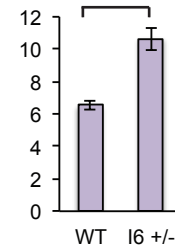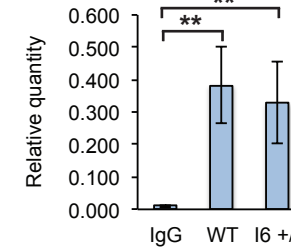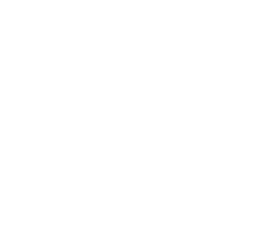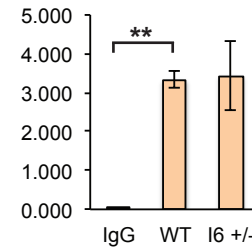

Supplement: supp [file elife-09268-supp-v1.zip]

**A**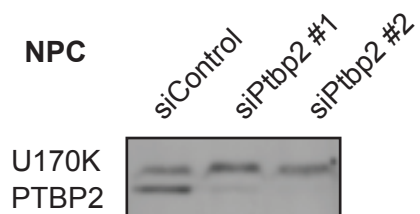**B**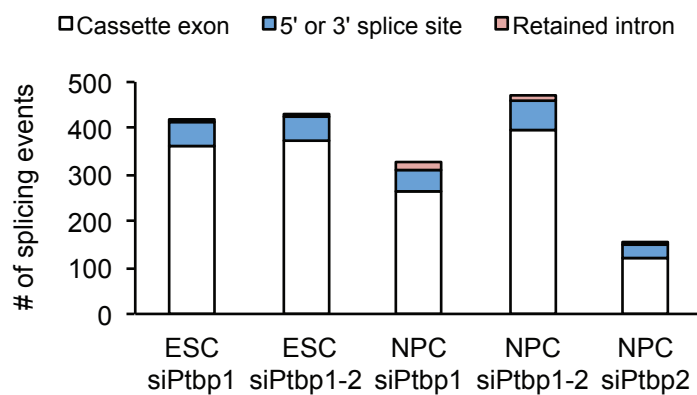**C**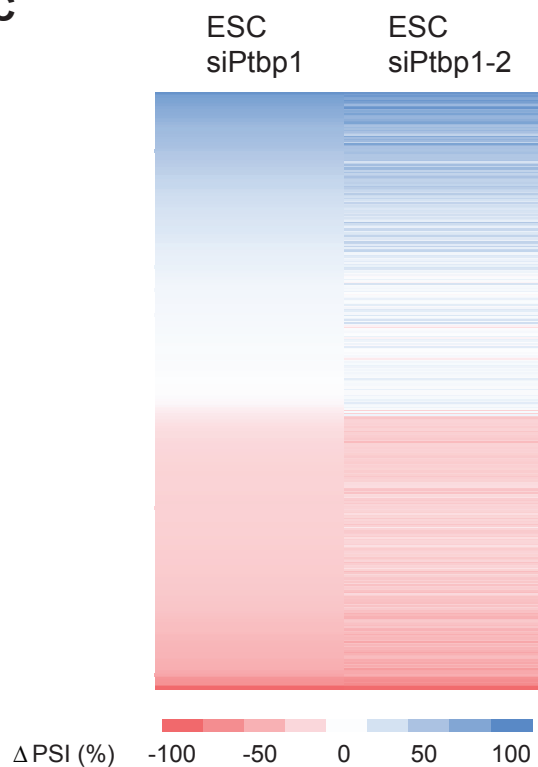**D**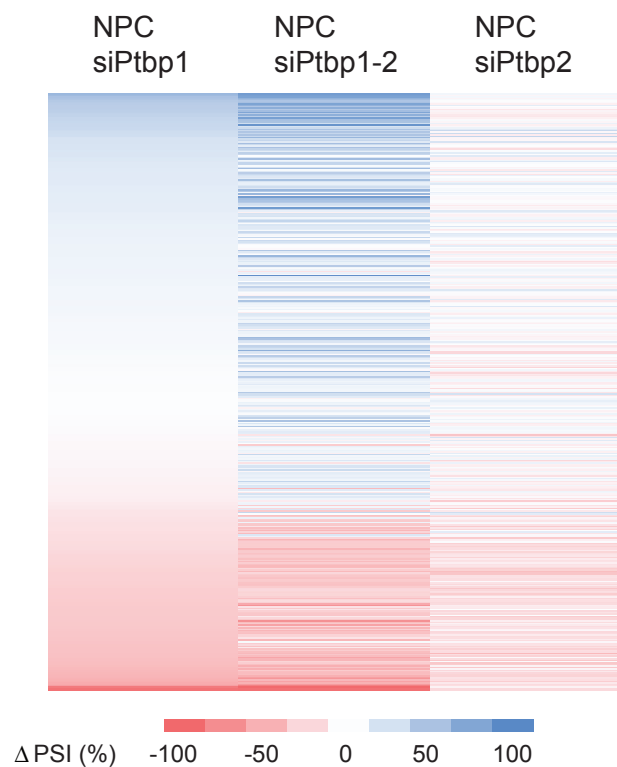**E**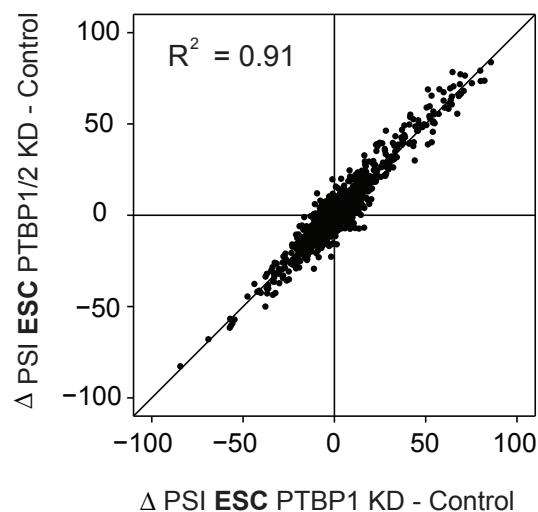**F**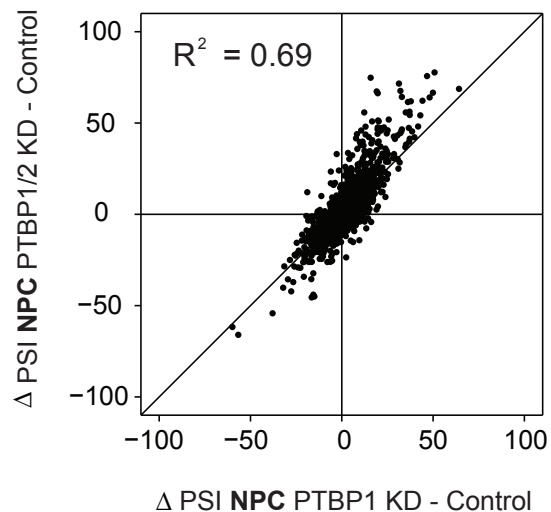

Supplement: supp [file elife-09268-supp-v1.zip]
